# Supplementary material for: Positron annihilation studies and complementary experimental characterization of xAg2O–(1 − x)(0.3CdO–0.7MoO3) metal oxide glass nanocomposites
Source: Royal Society of Chemistry journal article supplement (doi:10.1039/c6ra23680d), 2017-01-01
Supplement: c6ra23680d1.pdf [file c6ra23680d1.pdf]

**Electronic Supplementary Information (ESI):** Calculated weights of different reagents and the melting temperatures of the different glass nanocomposites  $x\text{Ag}_2\text{O}-(1-x)(0.3\text{CdO}-0.7\text{MoO}_3)$ . The samples are designated using the parameter  $x$ , i.e., concentration of  $\text{Ag}_2\text{O}$  in the glass nanocomposite.

| Sample designation ( $x$ ) | $\text{AgNO}_3$ (g) | $\text{CdO}$ (g) | $\text{MoO}_3$ (g) | Melting temperature ( $^\circ\text{C}$ ) |
|----------------------------|---------------------|------------------|--------------------|------------------------------------------|
| 0.0                        | 0.0                 | 0.2766           | 0.7234             | 950                                      |
| 0.1                        | 0.0017              | 0.2762           | 0.7226             | 935                                      |
| 0.2                        | 0.0026              | 0.2758           | 0.7215             | 930                                      |
| 0.3                        | 0.0044              | 0.2753           | 0.7202             | 920                                      |
| 0.5                        | 0.0104              | 0.2737           | 0.7159             | 900                                      |
| 0.7                        | 0.0240              | 0.2699           | 0.7061             | 875                                      |
| 0.9                        | 0.0865              | 0.2526           | 0.6608             | 850                                      |
